# Supplementary material for: Comparative Experimental Study of Wound Healing in Mice: Pelnac versus Integra
Source: PLoS One. 2015 Mar 23;10(3):e0120322. doi: 10.1371/journal.pone.0120322 (PMC4370513; doi:10.1371/journal.pone.0120322)
Supplement: S1 Table — Data of Fig. 2. Values represent the individual measures and means expressed as mm, standard errors (SEM), the number of animal (n) and the P value between the animal groups. (XLSX) [file pone.0120322.s001.xlsx]

## Sheet: Plan1
Days after surgery	Treatment
	Integra								Pelnac								P value
	Individual measures					Mean	SEM	n	Individual measures					Mean	SEM	n
3	1770	2041	2653	1722	2443	2126	0.184	5	1543	0.720	1960	1520	1400	1429	0.200	5	0.03
6	2215	1733	2276	2086	1551	1972	0.141	5	0.901	1175	1445	1198	0.703	1084	0.128	5	0.001
9	1736	2996	2150	1296	2000	2036	0.028	5	1696	1796	1956	1673	1800	1784	0.050	5	0.4
